# Supplementary material
Source: publisher site journal article supplement (https://www.dovepress.com/article/455967)
Supplement: Supplementary file 1 [file get_supplementary_file.php]

**Date of interview___________ Questioner number ________________**

| **Section One: - Socio-demographic characteristics of respondents** | | | |
| --- | --- | --- | --- |
| **No** | **Questions** | **Responses** | **Skip** |
| **101** | Sex | 1.Male  2.Female |  |
| **102** | Age (in completed years) | ________________ |  |
| **103** | Educational status | 1. Un able to read and write 2. Read and write only 3. Elementary (grade 1-8) 4. Secondary (grade 9-12) 5. College and above   99.Other(Specify) ______ |  |
| **104** | Work Experience | _______ Years ______Months |  |
| **105** | Work Title | 1. Metal work professional 2. Assistant/ Apprentice/Helper |  |
| **106** | What is your main role/job responsibility? | 1. Welding 2. Grinding 3. Cutting 4. Painting 5. Lifting/carrying 6. Assisting   99. Other (specify) _________ |  |
| **107** | Employment status | 1. Definite 2. Indefinite |  |
| **108** | How many days do you spend on work per week? | ________Days |  |
| **109** | How many hours do you spend on your work per day? | ________Hours |  |
| **110** | Working at Night | 1. Yes 2. No |  |
| **111** | Marital status? | 1. Single 2. Married 3. Divorced 4. Widowed |  |
| **112** | Monthly Net Income? | _____________Ethiopian Birr |  |
| **Section two: Personal factors** | | | |
| **No** | **Questions** | **Responses** | **Skip** |
| **201** | Do you regularly smoke cigarette? | 1. Yes 2. No |  |
| **202** | Do you drink alcohol? | 1. Yes 2. No |  |
| **203** | If yes to Q. 202, How often do you drink alcohol? | 1. Every day 2. 2-4 times a week 3. 2-4 times a month 4. Monthly or more |  |
| **204** | Do you chew Khat? | 1. Yes 2. No |  |
| **205** | If yes to Q. 202, How often do you chew Khat? | 1. Every day 2. 2-3 times a week 3. 2-4 times a month 4. Monthly or more |  |
| **206** | How well are you satisfied with your overall current job? | 1. Very satisfied 2. Satisfied 3. Not sure 4. Unsatisfied 5. Very unsatisfied |  |
| **207** | How well are you satisfied with your current salary? | 1. Very satisfied 2. Satisfied 3. Not sure 4. Unsatisfied 5. Very unsatisfied |  |
| **208** | Do you have any sleeping disorder (inability to sleep/ feeling extreme sleepiness) | 1. Yes 2. No |  |
| **Section Three: information and knowledge factors** | | | |
| 301 | Have you ever taken professional training in metal work? | 1. Yes 2. No |  |
| 302 | Have you ever taken professional training in occupational health and safety in metal work? | 1. Yes 2. No |  |
| 303 | I am fully aware of hazards in my daily job | 1. Yes 2. No |  |
| 304 | Personal protective equipment’s’ should be worn during work according to the task performed? | 1. Yes 2. No |  |
| 305 | Supervisors should have to perform risk assessment on a regular basis | 1. Yes 2. No |  |
| 306 | Every hazard should have to clearly label even though you are aware of it. | 1. Yes 2. No |  |
| 307 | Adherence to personal protective equipment is the only effective way to prevent injuries? | 1. Yes 2. No |  |
| 308 | Any injury should have to be immediately reported to immediate supervisor/boss? | 1. Yes 2. No |  |
| 309 | Exposure to metal fumes and dust causes problem on health | 1. Yes 2. No |  |
| 310 | All types of gloves provide same level of protection | 1. Yes 2. No |  |
| 311 | Fire extinguishers (sand buckets) should be readily available at our workshop | 1. Yes 2. No |  |
| 312 | If spraying paint is done outdoor there is no more need for protection. | 1. Yes 2. No |  |
| **Section Four: attitude related factors** | | | |
| 401 | It is preferred to spend more time on a task to ensure it is done safely; rather than rushing to complete a task. | 1. Strongly agree 2. Agree 3. Neutral 4. Disagree 5. Strongly disagree |  |
| 402 | Performing my work safely has become a habit for me rather than a challenge | 1. Strongly agree 2. Agree 3. Neutral 4. Disagree 5. Strongly disagree |  |
| 403 | Every employee is responsible for their own safety in the organisation? | 1. Strongly agree 2. Agree 3. Neutral 4. Disagree 5. Strongly disagree |  |
| 404 | Regular supervision encourage employee to comply with occupational safety standard? | 1. Strongly agree 2. Agree 3. Neutral 4. Disagree 5. Strongly disagree |  |
| 405 | Safety gears/PPEs are not comfortable with my work. | 1. Strongly agree 2. Agree 3. Neutral 4. Disagree 5. Strongly disagree |  |
| 406 | Safety signs are visible for everyone to see | 1. Strongly agree 2. Agree 3. Neutral 4. Disagree 5. Strongly disagree |  |
| 407 | I think it is necessary to have medical checkups annually for work related disorders | 1. Strongly agree 2. Agree 3. Neutral 4. Disagree 5. Strongly disagree |  |
| 408 | Workers need to be trained of using clothing, gloves, face mask, glass | 1. Strongly agree 2. Agree 3. Neutral 4. Disagree 5. Strongly disagree |  |
| 409 | At least once in a year training should be given to us on occupational health and safety | 1. Strongly agree 2. Agree 3. Neutral 4. Disagree 5. Strongly disagree |  |
| 410 | I think I should not continue working if I lack personal protective equipment | 1. Strongly agree 2. Agree 3. Neutral 4. Disagree 5. Strongly disagree |  |
| **Section five: Practice related factors** | | | |
| 501 | How often do you clear your work space before starting work? | 1. Always 2. Usually 3. Sometimes 4. Rarely 5. Never |  |
| 502 | How often do you adhere to manufacturers’ instruction during handling machines? | 1. Always 2. Usually 3. Sometimes 4. Rarely 5. Never |  |
| 503 | How often do you wear safety shoes/boots during work? | 1. Always 2. Usually 3. Sometimes 4. Rarely 5. Never |  |
| 504 | How often do you wear coverall suit during work? | 1. Always 2. Usually 3. Sometimes 4. Rarely 5. Never |  |
| 505 | How often do you wear safety glasses/face shields during work? | 1. Always 2. Usually 3. Sometimes 4. Rarely 5. Never |  |
| 506 | How often do you wear respiratory protection during work? | 1. Always 2. Usually 3. Sometimes 4. Rarely 5. Never |  |
| 507 | How often do you wear ear protection/ear muffs during work? | 1. Always 2. Usually 3. Sometimes 4. Rarely 5. Never |  |
| 508 | How often do you wear helmets during work? | 1. Always 2. Usually 3. Sometimes 4. Rarely 5. Never |  |
| 509 | How often do you wear aprons during work? | 1. Always 2. Usually 3. Sometimes 4. Rarely 5. Never |  |
| 510 | How often do you use safety manuals during work? | 1. Always 2. Usually 3. Sometimes 4. Rarely 5. Never |  |
